# Supplementary material for: Integrative proteomic and gene expression analysis identify potential biomarkers for adjuvant trastuzumab resistance: analysis from the Fin-her phase III randomized trial
Source: PubMed Central journal article supplement (PMC4745800; doi:10.18632/oncotarget.5080), 2015-09-03
Supplement: oncotarget-06-30306-s001.pdf [file oncotarget-06-30306-s001.pdf]

SUPPLEMENTARY FIGURE, TABLES AND LEGENDS

CONSORT Diagram for the fin-her trial

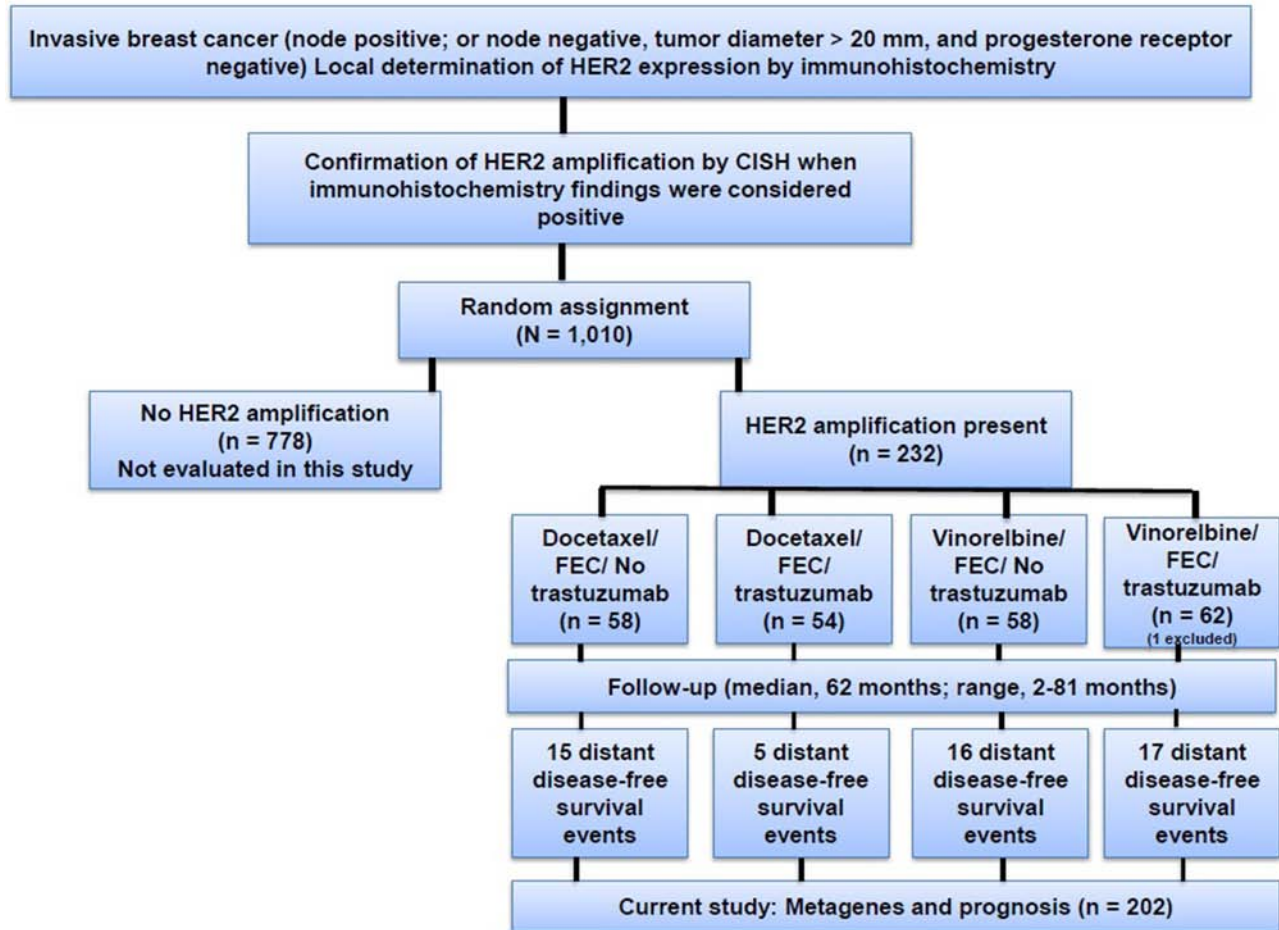

Supplementary Figure S1: CONSORT diagram of the fin-her trial.

**Supplementary Table S1: Gene signatures that passed external validation.**

|                       | correlation R     | AUC               | AUC FDR                   |
|-----------------------|-------------------|-------------------|---------------------------|
| GATA3                 | 0.802444568208424 | 0.918461538461538 | 1.5601428549056E-027      |
| ER-alpha              | 0.676917979165032 | 0.806153846153846 | 0.0000243366625526168     |
| Lck                   | 0.640773427489008 | 0.758461538461538 | 0.00147874197520389       |
| DJ-1                  | 0.614607211758244 | 0.778461538461538 | 0.00041892051625558       |
| Annexin_I             | 0.609487174567616 | 0.824615384615385 | 0.000000531216678363221   |
| Caspase-7_cleavedD198 | 0.608719078173738 | 0.872307692307692 | 0.00000000103142117383112 |
| Chk2                  | 0.549234199491372 | 0.804615384615385 | 0.0000380175594917789     |
| Notch1                | 0.545198878352904 | 0.773846153846154 | 0.000348502905380549      |
| Bcl-2                 | 0.529220569972019 | 0.829230769230769 | 0.000000410920636804509   |
| Syk                   | 0.5073541665497   | 0.776923076923077 | 0.000161221889728158      |

AUC- area under the curve

fdr- false discovery rate

**Supplementary Table S2: List of the validated RPPA based signatures.**

**Supplementary Table S3: GO analysis for each of the 10 signatures.**

**Supplementary Table S4: MSigDB analysis for each of the 10 signatures.**
